# Supplementary material
Source: PubMed Central journal article supplement (PMC7529926)
Supplement: NIHMS1601601-supplement-1.pdf [file NIHMS1601601-supplement-1.pdf]

**Supplementary Figure 1**

**Extended Data Figure 2b**

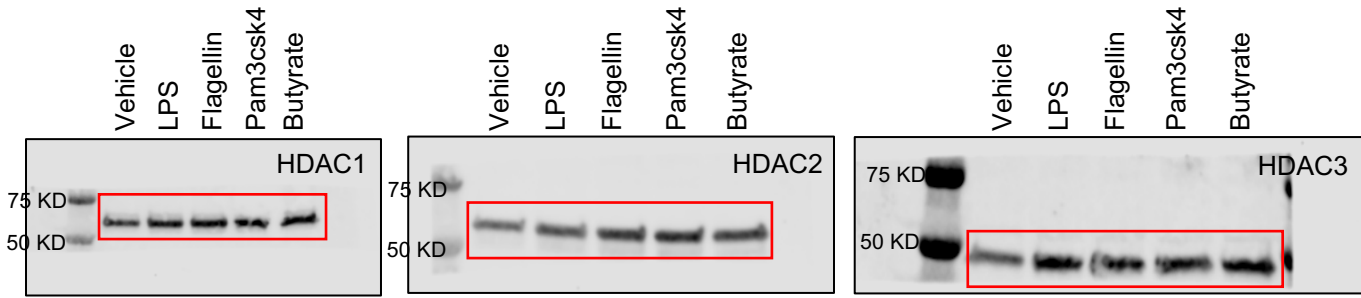

**Extended Data Figure 1d**

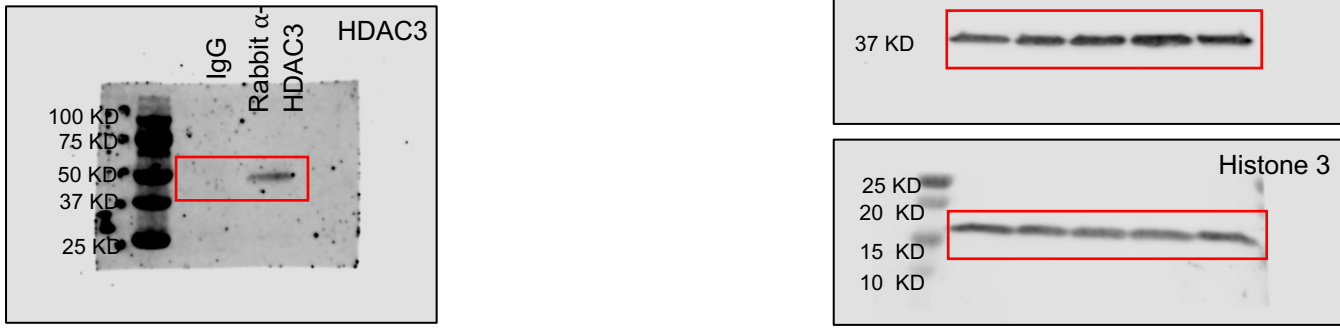

**Extended Data Figures 4c, 5e**

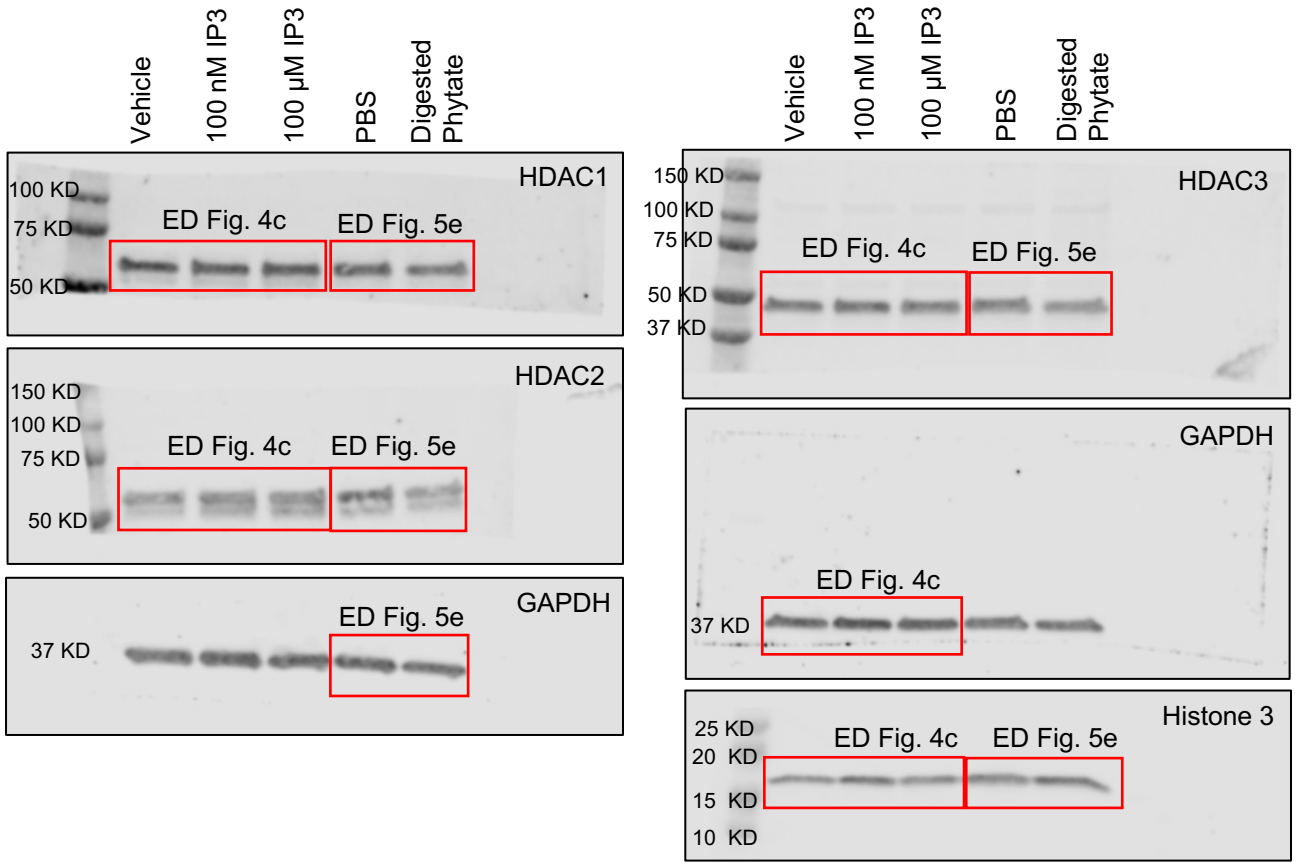

**Supplementary Figure 1. Source data for immunoblots.** Uncropped scans of western blots presented in the manuscript. Red rectangles indicate cropped boundaries. GAPDH and Histone 3 were run on the same gel as loading controls.

# Supplementary Figure 2

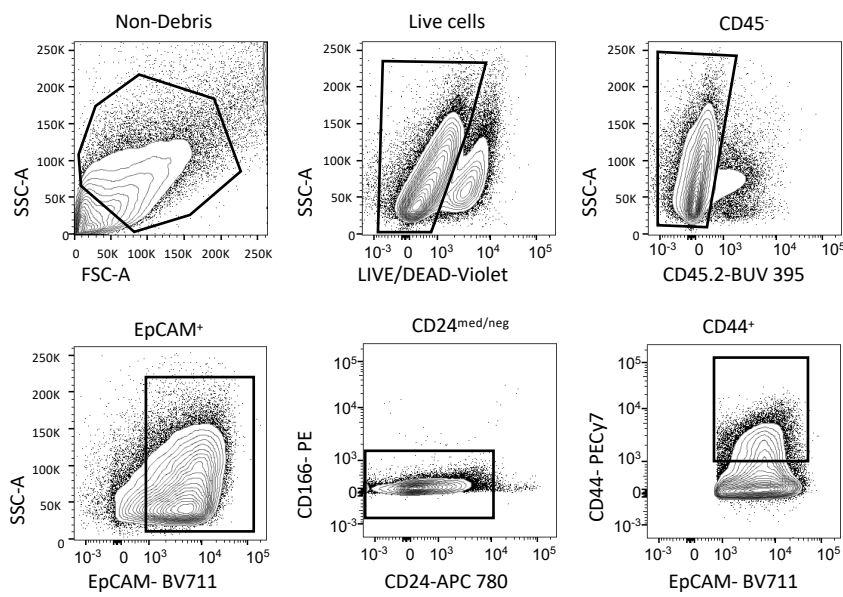

**Supplementary Figure 2. Gating for colonic IECs.** Flow cytometry gating employed for EpCam<sup>+</sup> IECs and CD44<sup>+</sup> IESCs.
